# Supplementary material
Source: Springer Nature journal article supplement (https://www.springermedizin.de/resource/supplementary/12885_2009_1881_MOESM5_ESM.pdf/9461476)

**FAS-L - day 10**

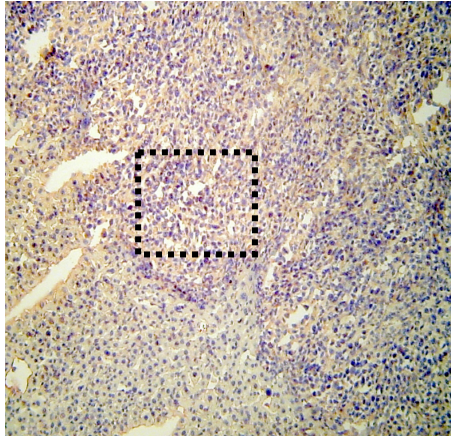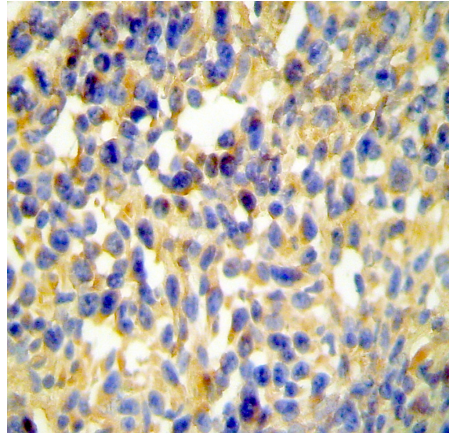

**FAS-L - day 20**

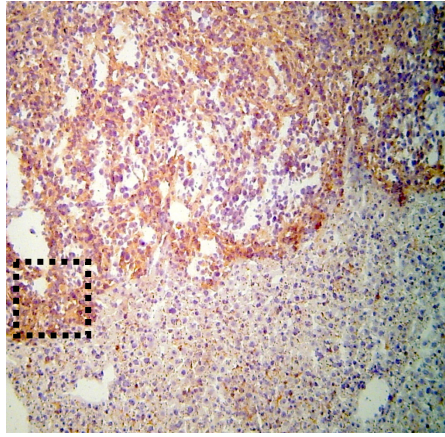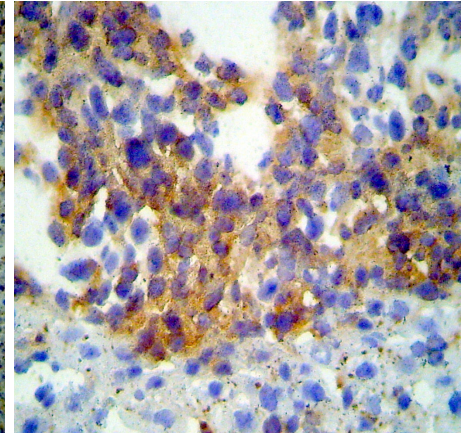

**FAS - day 10**

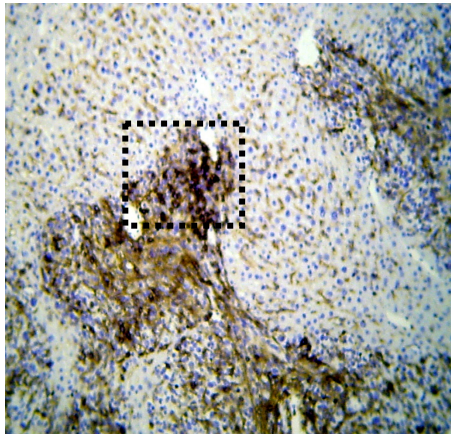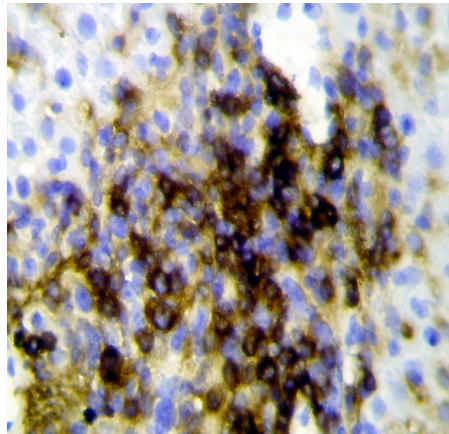

**FAS - day 20**

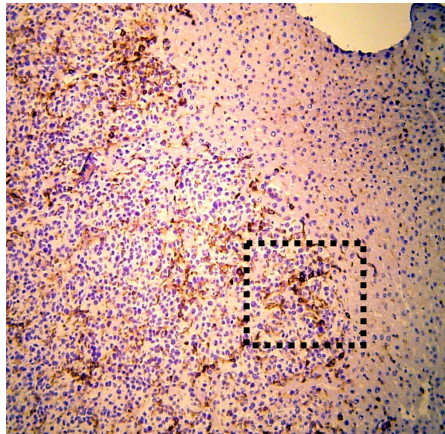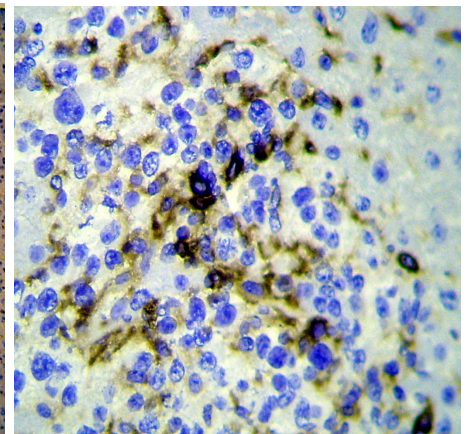

Supplement: MOESM5 [file 9461476]
